# Supplementary material for: Annexin-V/quantum dot probes for multimodal apoptosis monitoring in living cells: improving bioanalysis using electrochemistry
Source: Royal Society of Chemistry journal article supplement (doi:10.1039/c4nr07191c), 2015-01-01
Supplement: c4nr07191c1.pdf [file c4nr07191c1.pdf]

## Electronic Supplementary Information (ESI)

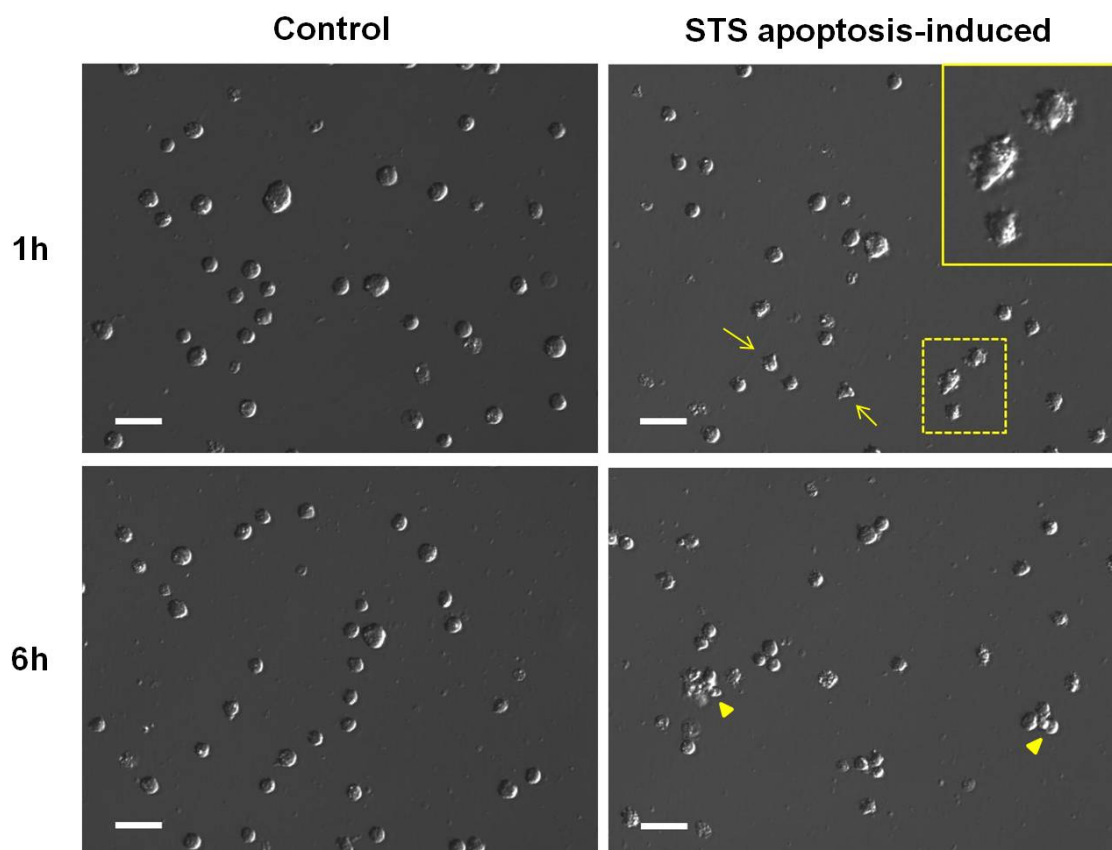

**Fig. S-1. Check of cell cultures during pro-apoptotic drug (STS) incubation.** Phase contrast images at 1 and 6 h show that some cells begin to change its homogenous round shape after 1 h in apoptosis-induced cell cultures exhibiting cell shrinkage and membrane blebbing (arrows and magnified squared area). After 6 h, the number of cells presenting shrinkage and membrane blebbing increases, and also a tendency to group in small lumps (arrow heads) can be observed in apoptosis-induced cell cultures whereas control cells preserve their healthy round shape and keep their single cell organization within the medium. Scale bars 20  $\mu\text{m}$ .

**Negative Control  
(no QD-labeling)**

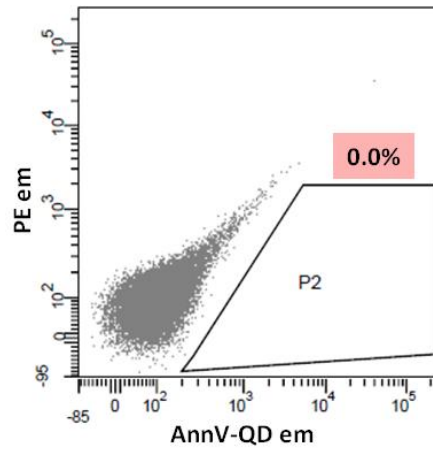

**Fig. S-2. Negative control of flow cytometry analysis.** A negative control without AnnV-QD labeling was analyzed in order to establish the parameters of QD labeling detection. P2 area was selected out of the cloud of control cells and in the region where QD were supposed to be detected according to their spectral characteristics (maximum emission at 655 nm). These settings were kept for the analysis of control and induced cultures. AnnV-QD em = fluorescence intensity emitted at 655 nm. PE em = fluorescence intensity emitted at 585 nm (used as control).
